# Supplementary material
Source: MDPI journal article supplement (https://www.mdpi.com/2071-1050/12/4/1351)
Supplement: s1 [file s1]

Archive with 2 entries (2 files):
- S1_RESORTES - 01 STUDENTS_EN.pdf
- S2_RESORTES - 01 STUDENS_SPANISH.pdf
